1 **NtrX systemically controls transcription of the CtrA system genes to regulate**  
2 ***Rhizobium* cell division**

3  
4 Shenghui Xing<sup>#</sup>, Fang An<sup>#</sup>, Xinwei Yang, Leqi Huang, Shuang Zeng, Ningning Li,  
5 Khadidja Ouenzar, Junhui Yan, Liangliang Yu, Li Luo\*

6  
7 Shanghai Key Laboratory of Bio-energy Crops, School of Life Sciences, Shanghai  
8 University, Shanghai 200444, China

9  
10 **Running title:** NtrX positively controls *Sinorhizobium* cell division

11 \*Correspondence: [liluo@shu.edu.cn](mailto:liluo@shu.edu.cn).

12 <sup>#</sup>The authors contributed equally to this work.

13  
14  
15  
16  
17  
18  
19  
20  
21  
22  
23  
24  
25 **Abstract**

26 In  $\alpha$ -proteobacteria, the CtrA signaling pathway regulates cell cycle progression. A  
27 species whose cell duplication is associated with CtrA stability is affected by the  
28 response regulator NtrX. However, the function of NtrX acting on the cell cycle

29 regulation in bacteria remains unclear. Here, we report that NtrX controls  
30 transcription of the CtrA system genes involved in cell cycle regulation in a legume  
31 symbiont, *Sinorhizobium meliloti*. Three groups of *ntrX* mutants showed the similar  
32 cell cycle defects, such as slow growth, abnormal shapes, and irregular genomic DNA  
33 accumulation. Expression of the CtrA signaling pathway genes including *ctrA*, *gcrA*,  
34 *dnaA*, *divL* and *cpdR1*, is differentially regulated by the phosphorylated NtrX protein.  
35 The regulation is achieved through direct protein-DNA interactions. The 53<sup>rd</sup> aspartate  
36 residue known as the conserved phosphorylation site and located in the receiver  
37 domain of NtrX, is required for *S. meliloti* cell cycle regulation. Interestingly,  
38 expression of *S. meliloti ntrX* derivatives in *Caulobacter* and *Agrobacterium* strains  
39 showed distinct defects of cell duplication and growth, suggesting that NtrX plays  
40 different roles in cell cycle regulation in these bacteria. Our findings demonstrate that  
41 NtrX is an upstream transcriptional regulator of the CtrA signaling pathway in *S.*  
42 *meliloti*, which could be associated with nitrogen nutrient response.

43

44 **Key words:**

45 NtrX; Rhizobium; transcriptional regulation; cell cycle; CtrA

46

47

48

49 **Author Summary**

50 Cell cycle regulation in alpha-proteobacteria is dictated by the conserved CtrA  
51 signaling pathway. Transcription of the CtrA system genes is mainly regulated by  
52 CtrA and GcrA. CcrM, SciP and MucR also participate in transcription regulation of  
53 *ctrA*. However, the regulation by a nutrient response regulator at transcriptional level  
54 remains unclear. Here, we report that the nitrogen response regulator, NtrX  
55 systemically regulates transcription of several CtrA system genes by protein-DNA  
56 interactions in a legume symbiont, *S. meliloti*. The similar mechanism is proposed in  
57 the pathogens of *Agrobacterium* and *Brucella* species. These findings provide a new  
58 prospect to understand the hierarchy of transcriptional regulation in a bacterial cell  
59 cycle.

60

61

62

### 63 **Introduction**

64 In  $\alpha$ -proteobacteria, *Caulobacter crescentus* serves as a study model for cell cycle  
65 regulation, asymmetric division and cell differentiation. A dividing *Caulobacter*  
66 mother cell produces two daughter cells: a smaller flagellated cell and a larger stalked  
67 cell(1). The phosphorylation cascade centered on the response regulator CtrA includes  
68 upstream histidine kinases CckA, DivL, DivJ, and PleC, response regulators DivK,  
69 ChpT, and CpdR, and transcriptional regulators DnaA, GcrA, SciP, and MucR(1-6).  
70 The histidine kinase senses unknown signals, autophosphorylates, sequentially  
71 transfers phosphate groups to the response regulator CtrA, and regulates downstream  
72 gene (including several transcription factor genes) expression to control flagellar  
73 generation, DNA replication, and cell division and differentiation(3).

74 Unlike *C. crescentus*, rhizobia belonging to  $\alpha$ -proteobacteria are usually symbionts of  
75 leguminous plants. These bacteria infect specific host legumes under soil nitrogen-  
76 limiting conditions, induce nitrogen-fixing root nodule formation, and provide  
77 combined nitrogen for host plant growth and development. Rhizobial cell division  
78 occurs on the root surface of host plants after adhesion and the inside tubule called an  
79 infection thread which extends into root hairs, root epidermal cells and cortical cells,  
80 then the bacteria release into the host cytoplasm in the infection zone of legume  
81 nodules(7). It has been found that NCR (Nodule Cysteine-Rich) peptides secreted by  
82 the host plant determine the terminal differentiation of nitrogen-fixing bacteroids in  
83 the indeterminate nodule (such as the root nodules of *Medicago* species)(8-11).  
84 However, the regulatory mechanism by which rhizobia duplicate in host cells is  
85 largely unknown. Due to the conservation of the CtrA regulatory system in  $\alpha$ -  
86 proteobacteria, some homologous genes encoding components of this system that  
87 function in cell cycle regulation, such as *ctrA*, *ccrM*, *cpdR1*, *divJ*, *divK*, *gcrA*, and  
88 *pleC*, have been identified in *Sinorhizobium meliloti* (the symbiont of *Medicago*  
89 species)(12-14). Additionally, a few specific genes, such as *cbrA*, are essential for cell  
90 cycle regulation through interplay with the CtrA system(15, 16).

91 The NtrY/NtrX two-component system that was first discovered in *Azorhizobium*  
92 *calinodans*; proved to regulate nitrogen metabolism under free-living conditions, and  
93 affect nodulation and nitrogen fixation in the host *Sesbania rostrata*(17).  
94 Subsequently, genes homologous to *ntrY/ntrX* have been found to regulate nitrogen  
95 metabolism and symbiotic nodulation in *Rhizobium tropici*(18). Moreover, the  
96 NtrY/NtrX homologous system regulates nitrate uptake in *Azospirillum brasilense*  
97 and *Herbaspirillum seropedicae*(19, 20), and this regulatory system has been found to  
98 simultaneously control nitrogen metabolism and cellular redox status in *Rhodobacter*  
99 *capsulatus*(21), and to regulate cell envelope formation in *R. sphaeroides*(22). In  
100 *Brucella abortus*, the histidine kinase NtrY participates in micro-oxygen signaling and  
101 nitrogen respiration (23), and in *Neisseria gonorrhoeae*, the response regulator NtrX  
102 controls expression of respiratory enzymes (24). Interestingly, the NtrY/NtrX system  
103 regulates cell proliferation, amino acid metabolism and CtrA degradation in *Ehrlichia*  
104 *chaffeensis*(25). NtrX is required for survival of *C. crescentus* cells and its expression  
105 is induced by low pH(26). These findings indicated that bacterial NtrY/NtrX  
106 comprises a nitrogen metabolism regulatory system that may be associated with cell  
107 cycle regulation.

108 The NtrY component is a transmembrane histidine kinase, and NtrX is a response  
109 regulator of the NtrC family, consisting of a DNA-binding domain and a receiver  
110 (REC) domain(27, 28). X-ray diffraction crystallography data for the *B. abortus* NtrX  
111 protein indicate the following: the protein exists as a dimer; its REC domain is mainly  
112 composed of 5  $\alpha$ -helices and 5  $\beta$ -sheets; the DNA-binding domain contains an HTH  
113 (helix-turn-helix) motif, including 4  $\alpha$ -helices. Conversely, the C-terminal 3D (three-  
114 dimension) structure has not yet been resolved (28). In *B. abortus*, NtrX recognizes  
115 and binds via its HTH motif to a palindromic DNA sequence (CAAN<sub>3-5</sub>TTG) in the  
116 *ntrY* promoter to directly regulate expression of *ntrY*(27, 28). In *S. meliloti*1021 strain,  
117 NtrX regulates cell growth, flagellum formation, motility, succinoglycan biosynthesis,  
118 nodulation and nitrogen fixation (29, 30). In the present study, we investigated the  
119 regulatory mechanism by which NtrX controls cell division of *S. meliloti*.

120

121

122

## 123 **Results**

### 124 **Cell division defects of *S. meliloti ntrX* mutants.**

125 We previously reported that NtrX regulates succinoglycan production, flagellum  
126 formation and cell motility in *S. meliloti* based on the data from the plasmid insertion  
127 mutant, SmLL1 (*ntrX18*)(29). After we carefully examined the cells from the  
128 continuous subculture of LB/MC, a few abnormal cells appeared under a light  
129 microscope and a transmission electron microscope (Fig. 1A-B), suggesting that NtrX  
130 contributes to bacterial cell division. To test this possibility, the synchronized cells  
131 from MOPS minimal broth were sub-cultured into LB/MC, and the collected cells  
132 were used for evaluation of genomic DNA content with flow cytometry. The results  
133 showed that genomic DNA content (the peak) of *S. meliloti* 1021 at the time of zero  
134 was similar to that of 3-hour cultures, and the peak of the 1.5<sup>th</sup> hour was between  
135 them (Fig. 1C). Interestingly, the peak of the *ntrX18* cells at time of zero was close to  
136 that of *S. meliloti*1021, while the peaks after one and half hour and 3 hours culture  
137 were different from the wild type (Fig. 1C). Meanwhile, the peaks of the mutant cells  
138 are not similar at time zero compared with that of 3 hours culture. These results  
139 indicated that genomic DNA synthesis is affected by NtrX downregulation in the  
140 *ntrX18* mutant.

141 To exclude the polar effect of *ntrX18*, we had to construct a depletion strain, since the  
142 *ntrX* deletion mutant has not successfully been screened(29). In this strain, the  
143 genomic *ntrX* gene has been deleted, and the vector of pSRK-Gm has shown to  
144 contain an *ntrX* gene in control of the promoter of *lacIQ*(31). Thus, the NtrX protein  
145 is expressed from the plasmid after induction of IPTG (isopropyl  $\beta$ -D-thiogalactoside).  
146 We observed that the depletion strain did not grow in LB/MC broth without IPTG, but  
147 it grew well after induction of 1 mM IPTG (Fig. 1D), indicating that NtrX is required  
148 for *S. meliloti* cell duplication. The depletion cells had elongated, branched or  
149 irregular shapes in the LB/MC subculture without IPTG, whereas after induction of  
150 IPTG in the broth, the cells took on a shape similar to those of *S. meliloti* 1021

151 (Fig.1E). The genomic DNA content of the depleted cells was evaluated by flow  
152 cytometry. It showed that over three peaks were found in cells without IPTG  
153 induction, but one main peak appeared from the cells induced by IPTG, especially  
154 after 2-hour IPTG treatment (Fig. 1F), suggesting that NtrX is essential for bacterial  
155 genomic DNA replication. These observations confirm that NtrX is a new regulator of  
156 bacterial cell division.

157 **Expression of the CtrA system genes is regulated by NtrX in *S. meliloti* cells.**

158 The defects of the *ntrX* mutants provided a possibility that NtrX regulates the cell  
159 cycle genes at transcriptional level. Quantitative RT-PCR (qRT-PCR) was employed  
160 to evaluate differential expression of cell cycle regulatory genes in LB/MC  
161 subcultures of synchronized *S. meliloti* cells. Transcript levels of *ntrX*, *pleC*, *gcrA* and  
162 *ccrM* have varied similarly in the wild-type cells, from increase to decrease during  
163 three hours (Fig. 2A). In contrast, transcript levels of *ctrA*, *dnaA*, *chpT*, *cpdR1* and  
164 *ftsZ1* decreased at first, and then increased in the wild-type cells (Fig. 2A). Transcript  
165 levels of *ntrY*, a histone kinase gene appeared stable during three hours (Fig. 2A).  
166 These data suggested that expression of these genes (except *ntrY*) is in a cyclical  
167 manner. Transcripts of *ntrX*, *pleC*, *chpT*, *cpdR1*, *dnaA* and *ftsZ1* were significantly  
168 reduced in the *ntrX18* cells compared with the wild-type (Fig. 2A), suggesting that  
169 NtrX is a positive transcription regulator for these genes. On the contrary, transcripts  
170 of *ntrY*, *gcrA*, *ccrM*, even and *ctrA* (except the first period) were significantly elevated  
171 in the mutant cells compared with the wild-type (Fig. 2A), suggesting that NtrX is a  
172 negative transcription regulator for these genes. Therefore, NtrX seems to control the  
173 cell cycle regulatory genes at transcriptional level in the reverse way.

174 To confirm the above results, transcript levels of above genes were evaluated in the  
175 *ntrX* depletion strain with or without IPTG induction by qRT-PCR. Transcripts of *ntrX*  
176 were enormously accumulated in the cells induced by IPTG (Fig. 2B).  
177 Correspondingly, transcripts of *pleC*, *chpT*, *cpdR1*, *dnaA* and *ftsZ1* significantly  
178 increased in the cells after 2 or 3-hour IPTG treatment compared with those cells  
179 without treatment (Fig. 2B). Meanwhile, transcription of *ntrY*, *ctrA*, *gcrA* and *ccrM*  
180 was significantly repressed after 2-hour IPTG treatment (Fig. 2B). Thus, the data from

181 the depletion strain is consistent with those from *ntrX18*.  
182 The protein level of NtrX showed cyclical alterations in both cells of *S. meliloti* 1021  
183 and *ntrX18* from immune-blotting assays (Fig. 2C), supporting that NtrX is a  
184 transcriptional factor with a cyclical expression. NtrX proteins from the *ntrX18* cells  
185 were less than those from *S. meliloti* 1021 (Fig. 2C), confirming that *ntrX18* is a  
186 knock-down mutant. The CtrA protein level exhibited a similarly varied trend as  
187 reported in Sm1021 cells during 3 hours(32), whereas it apparently increased in those  
188 *ntrX18* cells (Fig. 2C). Two forms of GcrA proteins were detected in *S. meliloti* cells  
189 using our anti-GcrA antibodies, and the smaller one could be digested proteins (Fig.  
190 2C). The variation trends of GcrA larger protein from both Sm1021 and *ntrX18* were  
191 similar to those of CtrA (Fig. 2C), confirming that NtrX represses the expression of  
192 *ctrA* and *gcrA* in *S. meliloti*. In the depletion cells, the levels of NtrX proteins  
193 apparently increased after IPTG induction (Fig. 2D). However, the protein levels of  
194 CtrA and GcrA apparently decreased in different extent (Fig. 2D). These data  
195 supported the conclusion that NtrX is a negative regulator for transcription of *ctrA*  
196 and *gcrA*.

197 To reconfirm that the expression of the CtrA system genes is regulated by NtrX, the  
198 promoter-*uidA* fusions were co-transformed with *pntrX* or the empty vector (pSRK-  
199 Gm) into *E. coli* DH5 $\alpha$ , respectively. X-Gluc staining showed that the activity of the  
200 promoter of *ctrA* or *gcrA* in the cells carrying *pntrX* was weaker than those cells  
201 carrying pSRK-Gm (Fig. 3A). In contrast, the activity of the *dnaA* promoter is  
202 apparently elevated in the cells co-expressing *ntrX* compared with the control (Fig.  
203 3A). These observations are consistent with quantitative analysis of GUS activities  
204 (Fig. 3B). These heterogeneous expression data supported the conclusion that NtrX  
205 negatively controls transcription of *ctrA* and *gcrA*, but positively regulates  
206 transcription of *dnaA*.

### 207 **Multiple defects of *S. meliloti* 1021 expressing NtrX<sup>D53E</sup>.**

208 As a two-component response regulator, NtrX contains an N-terminal receiver domain  
209 and a C-terminal DNA-binding domain(28). An invariant aspartate residue (D53) in

210 the receiver domain is the phosphorylation site of the protein from *Brucella* and  
211 *Caulobacter* species(26, 28). To determine the function of the 53<sup>rd</sup> aspartate of NtrX  
212 from *S. meliloti*, we first attempted to construct its substitutions of alanine, asparagine  
213 or glutamate in *S. meliloti* 1021 genome, but no mutants were successfully obtained,  
214 just like construction of the *ntrX* deletion(29). Therefore, we had to construct  
215 recombinant plasmids for inducible expression of NtrX<sup>D53A</sup>, NtrX<sup>D53N</sup> or NtrX<sup>D53E</sup>,  
216 and then introduced them respectively into *S. meliloti* by mating. Interestingly, many  
217 colonies containing *pntrX*<sup>D53E</sup> grew on LB/MC agar plates containing 0.1 M IPTG,  
218 whereas only a few colonies containing *pntrX*<sup>D53A</sup> or *pntrX*<sup>D53N</sup> were harvested (Fig.  
219 6E), suggesting that the 53<sup>rd</sup> aspartate of NtrX is vital for cell duplication of *S.*  
220 *meliloti*. The strain of *S. meliloti* 1021/*pntrX*<sup>D53E</sup> was used for phenotype analyses  
221 subsequently. It grew slowly in LB/MC broth compared with the strain of *S.*  
222 *meliloti*1021/pSRK-Gm or *S. meliloti* 1021/*pntrX* (Fig. 4A), confirming that NtrX<sup>D53E</sup>  
223 disrupts cell division of *S. meliloti*. Meanwhile, the strain of *S. meliloti*  
224 1021/*pntrX*<sup>D53E</sup> exhibited motility deficiency and overproduced succinoglycan (Fig.  
225 4B), just like the mutant of *ntrX*18(29). Many abnormal cells (larger, longer and  
226 irregular) of the strain were clearly observed under a fluorescence microscope  
227 compared with the cells of *S. meliloti* 1021/pSRK-Gm (somewhat similar to the  
228 *ntrX*18 cells, Fig. S2A), after introducing a constitutive-expression GFP while *S.*  
229 *meliloti* 1021 cells expressing NtrX displayed normal shapes, and a few cells moved  
230 rapidly (Table S1). Flow cytometry data showed that the fluorescence curve of *S.*  
231 *meliloti*1021/pSRK-Gm or *S. meliloti*1021/*pntrX* almost overlapped at time zero and  
232 at the 3<sup>rd</sup> hour, and it moved out at the 90<sup>th</sup> minute (Fig.4D). However, the  
233 fluorescence curves of *S. meliloti* 1021/*pntrX*<sup>D53E</sup> did not overlap, similar to those of  
234 *ntrX*18 with pSRK-Gm (Fig. 4D and Fig. S1B). These observations confirmed that the  
235 53<sup>rd</sup> aspartate of NtrX is essential for cell division of *S. meliloti*.

236 **Expression of cell cycle associated genes is disrupted by NtrX<sup>D53E</sup> in *S. meliloti*.**

237 The defects of cell division of *S. meliloti* 1021/*pntrX*<sup>D53E</sup> promoted us to evaluate the  
238 expression level of cell cycle related genes. The qRT-PCR assays showed that 0.1 M  
239 IPTG significantly induced transcription of *ntrX* or *ntrX*<sup>D53E</sup> (Fig. 5A).



240 Correspondingly, the transcript levels of *ctrA*, *gcrA*, *minC* and *ntrY* decreased or  
241 showed a decreasing trend in the strain of *S. meliloti* 1021/*pnrX* after treatment of  
242 IPTG compared with the cells without treatment, while those of *dnaA* and *ftsZ1*  
243 increased in the same condition (Fig. 5A), supporting the conclusion that NtrX  
244 negatively regulates transcription of *ctrA* and *gcrA*, but positively controls  
245 transcription of *dnaA*. In contrast, the transcript levels of *ctrA*, *gcrA*, *minC* and *ntrY*  
246 significantly increased in the strain of *S. meliloti* 1021/*pnrX*<sup>D53E</sup> after treatment of  
247 0.1M IPTG, while those of *dnaA* and *ftsZ1* decreased in the same condition (Fig.5A),  
248 suggesting that NtrX<sup>D53E</sup> disrupts regulation of the native NtrX protein in *S.*  
249 *meliloti*1021. Western blotting assays showed that more NtrX or NtrX<sup>D53E</sup> proteins  
250 were induced after two-hour treatment of 0.1M IPTG, but the proteins of CtrA and  
251 GcrA apparently decreased in the strain of *S. meliloti* 1021/*pnrX* (Fig. 5B).  
252 Interestingly, the protein level of CtrA and GcrA apparently increased in the strain of  
253 *S. meliloti* 1021/*pnrX*<sup>D53E</sup> after treatment of IPTG (Fig. 5B). These data are consistent  
254 with transcriptional results from qRT-PCR.

### 255 **Phosphorylated NtrX regulates cell division of *Rhizobium* species.**

256 The 3D structure of NtrX from *B. abortus* has been resolved by X-ray crystal  
257 diffraction(27, 28). It was successfully used for reconstruction of 3D structures of  
258 NtrX from *S. meliloti*, *Agrobacterium tumefaciencie* and *C. crescentus* in Swiss-Model  
259 server. The conserved NtrX receiver domains of the four bacterial species consist of  
260 five  $\alpha$ -helixes and five  $\beta$ -sheets, linked with loops (Fig. 5A-B). The invariant 53<sup>rd</sup>  
261 aspartate residue is located at the end of the third  $\beta$ -sheet, which is attracted by the  
262 105<sup>th</sup> lysine residue to form a salt bridge, together with the 9<sup>th</sup> and 10<sup>th</sup> aspartate  
263 residues, and the 11<sup>th</sup> glutamate residue for binding to one magnesium ion (Fig. 5B).  
264 The purified NtrX and the NtrY kinase domain His-fusion proteins were used for  
265 phosphorylation assays in Phos-Tag gel *in vitro*, showing that NtrX was  
266 phosphorylated by NtrY (Fig. 6C). The phosphorylated NtrX proteins were clearly  
267 observed in *S. meliloti* 1021 cells in Phos-Tag gel and by immuno-blotting, but almost  
268 no phosphorylated proteins in *ntrX18* cells were found because of less NtrX proteins  
269 (Fig. 6D). Levels of phosphorylated protein had apparently increased in *S. meliloti*

270 1021/*pnrX* cells after 1-hour IPTG induction compared with those from *S. meliloti*  
271 1021/*pnrX*<sup>D53E</sup> cells (Fig. 6D). The results indicated that the 53<sup>rd</sup> aspartate residue is  
272 the phosphorylation site of NtrX *in vivo*.

273 The mating tests showed that a lot of colonies expressing NtrX<sup>D53E</sup> were formed on  
274 the plates containing 0.1 M IPTG; a few small colonies expressing NtrX<sup>D53A</sup> were  
275 observed; almost no colonies were found on the same plates for the strain of *S.*  
276 *meliloti* 1021/*pnrX*<sup>D53N</sup> (Fig. 6E), indicating that the 53<sup>rd</sup> amino acid residue with  
277 negative charges is important for cell division. In contrast, expression of NtrX or  
278 NtrX<sup>D53E</sup> repressed growth of *A. tumefaciens* C58, whereas expression of NtrX<sup>D53A</sup> or  
279 NtrX<sup>D53N</sup> did not (Fig. 6F). Meanwhile, expression NtrX<sup>D53A</sup> or NtrX<sup>D53N</sup> did not  
280 suppress succinoglycan production, but expression of NtrX or NtrX<sup>D53E</sup> did in the  
281 strain (Fig. S3). Additionally, colonies of *C. crescentus* NA1000 carrying *pnrX* were  
282 not successfully obtained on YEB agar plates, but many colonies containing *pnrX*<sup>D53A</sup>,  
283 *pnrX*<sup>D53N</sup> or *pnrX*<sup>D53E</sup> appeared on the plates (data not shown). These results suggest  
284 that the phosphorylated NtrX proteins play a distinct role in cell cycle regulation of *A.*  
285 *tumefaciens* and *C. crescentus* and *S. meliloti*.

### 286 **NtrX recognizes a conserved promoter motif of cell cycle regulatory genes.**

287 To systemically identify downstream genes directly regulated by NtrX, chromatin  
288 immunoprecipitation-DNA sequencing (ChIP-Seq) was performed using anti-NtrX  
289 antibodies. Total 82 DNA fragments were precipitated, with 12 and 10 DNA  
290 fragments from the symbiotic plasmids SymA and SymB, respectively, and 60 DNA  
291 fragments from Chromosome (Fig.7A and Table S2). We examined sequencing data  
292 for these fragments and found that the enriched DNA fragments included genes  
293 associated with cell cycle regulation, such as *ctrA*, *dnaA*, *ftsZ1*, *divL* and *cpdR1*, some  
294 of which are presented as peak maps in Fig. 7B. These results suggest that the  
295 promoters of several cell cycle-related genes are specifically recognized *in vivo* by  
296 NtrX. To verify the ChIP-Seq results, each DNA fragment precipitated by anti-NtrX  
297 antibodies was evaluated by quantitative PCR, and the results were largely consistent.  
298 For example, the promoter fragments of *ctrA*, *dnaA*, *cpdR1*, *divL*, *ftsZ1* and *ntrY* were  
299 significantly enriched by anti-NtrX antibodies (Fig. 7C), whereas that of *minC* was

300 not. These results indicate that NtrX directly interacts with promoter DNA of several  
301 cell cycle regulatory genes.

302 To identify the conserved motif recognized by NtrX, the ChIP-Seq data were analyzed  
303 using the MEME program, revealing the presence of the motif CAAN<sub>x</sub>TTG in some  
304 of the precipitated DNA regions. This motif matches the *cis*-elements (CAAN<sub>3-5</sub>TTG)  
305 in the *ntrY* promoter recognized by NtrX from *B. abortus*, as based on foot-printing  
306 results (28). The motif was then used as a query to scan all gene promoter regions in  
307 the entire genome of *S. meliloti* 1021 using the genome-scan dna-pattern program on  
308 the RSAT server (<http://embnet.ccg.unam.mx/rsat>). According to the results, there are  
309 2155 CAAN<sub>(1-5)</sub>TTG motifs, of which 51.5% (1111) are located on Chromosome and  
310 25.0% (539) and 23.5% (508) are located on the symbiotic plasmids SymA and SymB  
311 respectively, including 358 CAAN<sub>3</sub>TTG, 529 CAAN<sub>4</sub>TTG, and 548 CAAN<sub>5</sub>TTG  
312 motifs (Fig. 8A). Moreover, 14 motifs were found in the promoter regions of cell  
313 cycle regulatory genes, such as the cell cycle-regulating transcription factor genes  
314 *ctrA*, *gcrA*, and *dnaA*, response regulator genes *chpT* and *cpdR1*, histidine kinase  
315 genes *divL*, *cckA*, *cbrA*, and *pleC*, and the Z-ring formation gene *ftsZ1* (Fig. 8B and  
316 Table S3).

317 To confirm whether the CAAN<sub>3-5</sub>TTG motifs in the *ntrY* gene promoter of *S. meliloti*  
318 are recognized by the NtrX protein, as in *B. abortus*(28), we synthesized biotinylated  
319 80-bp DNA probes (containing two conserved motifs of **CAACACCGTTG** and  
320 **CAATGCGTTG**) for gel retardation assays (Table S4). The results indicated the  
321 formation of two protein-DNA complexes (Fig. 8C), which suggests that the binding  
322 between NtrX and *ntrY* promoter is conserved in bacteria. To determine the  
323 importance of NtrX phosphorylation for target DNA binding, we replaced NtrX with  
324 NtrX<sup>D53E</sup> and then performed gel retardation assays. As almost no protein-DNA  
325 complex has been formed (Fig. 8C), it seems that only phosphorylated NtrX can  
326 efficiently bind to the *ntrY* promoter. We used the same approach to analyze the  
327 interaction between the NtrX protein and the *dnaA* promoter (a 75-bp DNA fragment  
328 containing the motif **CAAACCCCTTG**) *in vitro* and found specific complex  
329 formation with phosphorylated NtrX (Fig. 8E). To determine the functional

330 importance of conserved nucleotides in CAAN<sub>1-5</sub>TTG, we replaced A/T bases in the  
331 **CAAAACCCCTTG** sequence of the *dnaA* promoter probe with G/C  
332 (**CGGAACCCCG**) and then performed gel retardation assays. The results showed a  
333 little DNA-protein complex formation between phosphorylated NtrX and the probe  
334 harboring the replaced bases (Fig. 8E), indicating that the conserved A/T bases in the  
335 motif are essential for the NtrX-DNA interaction. We also examined the interaction  
336 between the *S. meliloti ctrA* gene promoter and the NtrX protein via the same  
337 approach and found that phosphorylated NtrX formed a specific complex with the  
338 DNA probe (containing the **CAACCTTG** motif) (Fig.8D). In addition,  
339 phosphorylated NtrX protein bound specifically to the promoter fragments of the *gcrA*  
340 and *ftsZ1* genes (containing motifs **CAAACCTTG** and **CAACTTG**, respectively)  
341 (Fig. 8F and S2). These results reveal that phosphorylated NtrX proteins can directly  
342 bind to promoter regions containing CAAN<sub>1-5</sub>TTG motifs from several cell cycle  
343 regulatory genes.

#### 344 **Distribution of NtrX binding sites in other $\alpha$ -proteobacteria.**

345 NtrX may work as a cell cycle transcriptional regulator in other  $\alpha$ -proteobacteria, such  
346 as *A. tumefaciens*, *B. abortus* and *C. crescentus*. This possibility is supported by the  
347 NtrX binding site analyses. Using the genome-scan dna-pattern program on the RSAT  
348 server (<http://embnet.ccg.unam.mx/rsat>), the motifs of NtrX in the whole-genome  
349 wide of other three  $\alpha$ -proteobacterial species showed that there are 1384, 2037 and  
350 2562 CAAN<sub>(1-5)</sub>TTG motifs in *C. crescentus*, *B. abortus* and *A. tumefaciens*,  
351 respectively. The promoters of conserved cell cycle regulatory genes were carefully  
352 scanned, showing that the promoter regions of *divJ*, *gcrA* and *ccrM* contain 1-2 motifs  
353 of CAAN<sub>(1-5)</sub>TTG in *C. crescentus*, four NtrX binding motifs in the promoter regions  
354 of *divK*, *gcrA*, *dnaA* and *rcdA* in *B. abortus*, and nine motifs in the promoter regions  
355 of *ctrA*, *dnaA*, *gcrA*, *ftsZ1* and *ftsZ2* in *A. tumefaciens* respectively (Fig. S4). These  
356 data provide a new cue to study the conservatism of cell cycle regulation mediated by  
357 NtrX in  $\alpha$ -proteobacteria.

358

359

360

## 361 **Discussion**

362 In several bacteria, NtrX is believed to be a response regulator of nitrogen  
363 metabolism(17-20, 23, 25), though it is associated with stability of CtrA (a  
364 determinant of cell cycle regulation in  $\alpha$ -proteobacteria) in *E. chaffeensis*(25). Many  
365 bacterial mutants associated with *ntrX* have been found to grow slowly, but the hiding  
366 control mechanism remained largely unknown. In the present study, we find that NtrX  
367 works as a key transcriptional factor to control expression of the CtrA system genes  
368 (such as *ctrA*, *gcrA*, *dnaA*, *cpdR1* and *divL*) and *ftsZ1* by recognizing a conserved  
369 motif (CAANxTTG) in the target promoters (Fig. 9). Our findings reveal that NtrX  
370 regulates bacterial cell division at the transcriptional level in the manner of multiple  
371 targets. Therefore, NtrX may be the regulatory linker of nitrogen metabolism and cell  
372 division.

373 According to literatures and our genetic and biochemical data, NtrX is not only the  
374 regulator of nitrogen metabolism, but also involved in metabolic regulation of carbon  
375 sources, oxygen gas, energy and even many macromolecules (protein, DNA, RNA  
376 and succinoglycan) (21, 23-25, 29, 33). The diverse functions of NtrX in bacteria  
377 could result from the transcriptional control of numerous genes. Many of them could  
378 be directly regulated by NtrX, since their promoters contain one conserved  
379 recognition site (CAANxTTG) at least (Table S3). Transcriptional regulation of these  
380 genes mediated by NtrX is needed to be further investigated.

381 NtrX is a novel cell cycle regulator in bacteria. This conclusion is supported by  
382 genetic and biochemical evidence. First, three groups of genetic materials were used  
383 for analyses of cell division defects and cell cycle regulatory gene expression, such as  
384 the plasmid insertion mutant *ntrX18*(29), the *ntrX* depletion strain ( $\Delta ntrX/pPlac-ntrX$ )  
385 and *S. meliloti* 1021/*pntrX*<sup>D53E</sup>. All three strains showed the consistent phenotypes of  
386 cell division, including slow growth, irregular cell shape, and genomic DNA increase  
387 (Fig. 1, 4 and 6). The defects of these strains may result from differential gene  
388 expression of cell cycle genes compared with their parent strains (Fig. 2, 3 and 5).  
389 From the expression data, we conclude that NtrX positively regulates transcription of

390 *dnaA*, but negatively controls expression of *ctrA* and *gcrA*. Therefore, NtrX may be an  
391 S-phase promoting regulator, since more S-phase cells were observed with  
392 overexpression of *ntrX* in *S. meliloti* 1021(Fig. 4D). Although the transcriptional  
393 control of these cell cycle genes is mediated by NtrX-promoter direct interactions (Fig.  
394 7-8), the details that key amino acid residues of the protein interact the vital bases  
395 (CAA or TTG) of the promoter will be further investigated.

396 Cell cycle regulation of NtrX may be not restricted in *S. meliloti*. This deduction is  
397 supported by the reverse genetic data from *A. tumefaciens*, though the regulation  
398 could be different (Fig. 6F and S4-5). An *ntrX* deletion mutant of *C. crescentus* was  
399 reported to not affect bacterial growth in the exponential phase(26). It is possible that  
400 the NtrX homologue does not function in the condition, as it affected cell growth by  
401 acid treatment(26). Noticeably, the amino acid sequence of NtrX from *C. crescentus* is  
402 very different from those of *B. abortus*, *A. tumefaciens* and *S. meliloti* (Fig. 6A),  
403 which could influence the protein function. Additionally, differential expression of  
404 cell cycle regulatory genes and distinct NtrX binding sites in their promoters (Fig.S4)  
405 could be associated with the function of NtrX homologues. Thus, NtrX-mediated cell  
406 cycle regulation may be plastic in  $\alpha$ -proteobacteria.

407 The 53<sup>rd</sup> aspartate residue is the phosphorylation site of NtrX (Fig. 6C-D), which is  
408 required for cell division in *S. meliloti* (Fig.4-5 and 6E). From the 3D structure  
409 reconstructed, this residue may form a salt bridge with the 105<sup>th</sup> lysine (Fig. 6B).  
410 After it is phosphorylated, the salt bridge could be strengthened to change the  
411 conformation of the protein. Biochemical evidence *in vitro* confirmed that NtrY  
412 phosphorylates NtrX (Fig. 6C), but the histidine kinase that phosphorylates it *in vivo*  
413 is not identified. It is possible that NtrX is phosphorylated by several histidine kinases  
414 that are able to perceive environmental cues, since over two histidine kinases can  
415 phosphorylate *in vitro* a response regulator from *C. crescentus*(2). Our previous data  
416 also showed that NtrY is not associated with NtrX-mediated regulation of motility,  
417 succinoglycan production or symbiotic nitrogen fixation(29), meaning NtrX may  
418 interact with other histidine kinases. We know that NtrX serves as a response  
419 regulator of nitrogen metabolism in several bacterial species, whereas NtrY appears to

420 be a sensor of oxygen in *B. abortus*(23). Therefore, nitrogen nutrient signals may be  
421 perceived by the conserved NtrB/NtrC system, and then delivered to NtrX for  
422 reprogramming downstream gene expression.

423 As *S. meliloti* is a symbiont of *Medicago* plants such as alfalfa, NtrX-mediated cell  
424 cycle regulation may occur in infected plant cells because the bacterial cells duplicate  
425 in infection threads and in infected nodule plant cells, and the *ntrX18* mutant showed  
426 a sever deficiency of symbiosis(29).

427

428

429

## 430 **Materials and Methods**

### 431 **Strains and culture medium**

432 *Escherichia coli* DH5 $\alpha$  and BL21 were cultured in LB medium at 37°C. *S. meliloti*  
433 strains (Sm1021, *ntrX18* or SmLL1 and derivatives) (29) were cultured in LB/MC  
434 medium at 28°C. MOPS-GS broth was utilized for cell synchronization of *S. meliloti*  
435 strains (34). *A. tumefaciens* C58 was cultured in LB medium at 28 °C, whereas *C.*  
436 *crescentus* N1000 was cultured in YEB medium at 28 °C. The following antibiotics  
437 were added to media: kanamycin, 50  $\mu$ g/ml; gentamicin, 10  $\mu$ g/ml; chloramphenicol,  
438 30  $\mu$ g/ml; neomycin, 200  $\mu$ g/ml; streptomycin, 200  $\mu$ g/ml; tetracycline, 10  $\mu$ g/ml.

### 439 **Recombinant plasmid construction**

440 Primers *PntrX1* and *PntrX2* carrying *HindIII* and *XbaI* digestion sites were used to  
441 amplify the *S. meliloti ntrX* gene (Table S4). The overlapping PCR primers NMF and  
442 NMR were used to amplify the *ntrX* gene fragment with substitution of aspartate with  
443 glutamate, asparagine or alanine (Table S4). Overlapping PCR was performed as  
444 described by Wang, 2013 (29). The PCR products were digested with *HindIII* and  
445 *XbaI* (Thermo) and ligated with digested pSRK-Gm(31) to obtain the recombinant  
446 plasmids *pnrX*, *pnrX<sup>D53E</sup>*, *pnrX<sup>D53A</sup>* and *pnrX<sup>D53N</sup>*. The depletion strain was  
447 screened on LB/MC agar plates containing 1mM IPTG after introduction of *pnrX*  
448 into *ntrX18*. Primers of *PntrYk1*, *PntrYk2*, *PntrX1<sup>D53E</sup>*, *PntrX2<sup>D53E</sup>*, *PctrA1*, *PctrA2*,  
449 *PgcrA1* and *PgcrA2* were used for amplification of the NtrY kinase encoding region,

450 *ntx<sup>D53E</sup>*, *ctrA* and *gcrA*, respectively (Table S4). The PCR fragments were digested  
451 by appropriate restriction enzymes and ligated into pET28b to harvest *pntxYk*,  
452 *pntx<sup>D53E</sup>*, *pctrA* and *pgcrA* for recombinant protein purification. Primers of *PctrAp1*,  
453 *PctrAp2*, *PgcrAp1*, *PgcrAp2*, *PdnaAp1* and *PdnaAp2* were used for amplification the  
454 promoter regions of the *ctrA*, *gcrA* and *dnaA*, respectively (Table S4). The PCR  
455 fragments were digested by appropriate restriction enzymes and ligated into pRK960  
456 to gain the recombinant plasmids *pPctrA*, *pPgcrA* and *pPdnaA*.

#### 457 **Bacterial cell synchronization**

458 The method of De Nisco was used for bacterial cell synchronization (34). A sample of  
459 *S. meliloti* cells were selected from an agar plate, placed in 5 ml LB/MC broth and  
460 grown overnight. A 100- $\mu$ l aliquot of bacterial culture was transferred to 100 ml  
461 LB/MC broth and incubated overnight until  $OD_{600}=0.1-0.15$ ; the culture was  
462 centrifuged (6, 500 rpm, 5 min, 4 °C), and the cell pellet was washed twice with  
463 sterilized 0.85% NaCl solution. The cells were resuspended in MOPS-GS  
464 synchronization medium and grown at 28°C for 270 min. After centrifugation, the  
465 cells were washed twice with sterilized 0.85% NaCl solution, resuspended in LB/MC  
466 broth, and cultured at 28°C. Synchronically cultivated bacterial cells were collected  
467 every 30 min (within 3 hours).

#### 468 **RNA extraction and purification**

469 Twenty milliliters of bacterial culture ( $OD_{600}\approx 0.8$ ) was collected by centrifugation (6,  
470 000 rpm, 5 min, 4°C), and the cells were washed twice with DEPC-treated water.  
471 RNA extraction was performed using 1 ml of Trizol (Life Technology) for RNA  
472 extraction, and its purification was performed as described by Wang, 2013 (29).

#### 473 **qRT-PCR and qPCR**

474 RNA reverse transcription was performed using PrimeScript RT reagent Kit with  
475 gDNA Eraser (TaKaRa). The qPCR reaction system included the following: SYBR®  
476 Green Real-time PCR Master Mix, 4.75  $\mu$ l; cDNA or DNA, 0.25  $\mu$ l; 10 pmol/ $\mu$ l  
477 primers, 0.5  $\mu$ l; ddH<sub>2</sub>O, 4.5  $\mu$ l. The reaction procedure was as follows: 95°C, 5 min;  
478 95°C, 30 s; 55°C, 30 s; 72°C, 1 kb/min. The selected reference gene was *Smc00128*.  
479 The  $2^{-\Delta\Delta CT}$  method was applied for analysis of gene expression levels. All primers



480 are listed in Table S4.

#### 481 **Chromatin immunoprecipitation (ChIP)**

482 ChIP was performed as described by Pini (32). Anti-NtrX antibodies prepared by  
483 Wenyuange (Shanghai) were used for ChIP assays(35).

#### 484 **Flow cytometry**

485 Four milliliters of fresh bacterial culture ( $OD_{600} = 0.3$ ) was centrifuged (6, 000 rpm, 5  
486 min, 4°C), and the cell pellets were washed twice with 0.85% NaCl solution (stored at  
487 4°C). The flow cytometry protocol of De Nisco was used (34). Each sample was  
488 assessed using a MoFlo XDF (Beckman Coulter) flow cytometer, and the results were  
489 analyzed using Summit 5.1 software (Beckman Coulter).

#### 490 **EMSA (electrophoretic mobility shift assay)**

491 EMSA was performed as described by Zeng (35). LightShift™ Chemiluminescent  
492 EMSA Kit (ThermoFisher) was applied in the assays. Probes for *ntrY*, *ctrA*, *dnaA*,  
493 *gcrA*, *ftsZ1* and *visN* promoter DNA labeled with biotin were synthesized (Invitrogen);  
494 the probes are listed in Table S4. Phosphorylated NtrXr proteins (from  $Ni^{2+}$  column  
495 purification) used in these assays were prepared. 6 µg of purified protein was mixed  
496 with 2 mM of acetyl phosphate (Sigma) in 100 µl of phosphorylation buffer (50 mM  
497 Tris-HCl pH7.6, 50mM KCl, 20 mM  $MgCl_2$ ), and incubated at 28 °C for one hour.  
498 Acetyl phosphate was removed using an ultra-filtration tube (Millipore), resolved in  
499 100 µl of phosphorylation buffer.

#### 500 **β-glucuronidase activity assay**

501 Activity assays of pP*ctrA-uidA*, pP*gcrA-uidA* and pP*dnaA-uidA* in *E. coli* DH5 were  
502 performed as described by Tang (36).

#### 503 **NtrX phosphorylation assay**

504 1 mg of His-NtrX fusion protein (NtrXr), and 1 mg of His-NtrY kinase domain fusion  
505 protein (NtrY-Kr) purified through  $Ni^{2+}$  column were used for NtrX phosphorylation  
506 assays *in vitro*. 2 mM of acetyl phosphate (Sigma) was mixed with 300 µg of NtrY-Kr  
507 in 1 ml of phosphorylation buffer, and then incubated at room temperature for one  
508 hour. Acetyl phosphate was removed using an ultra-filtration tube (Millipore),  
509 resolved in 1 ml of phosphorylation buffer. 1, 3 and 10 µg of phosphorylated NtrY-Kr

510 protein was added into 200  $\mu$ l of phosphorylation buffer with 10  $\mu$ g of NtrXr, and  
511 incubated at 28 °C overnight. The samples were separated by Phos-Tag gel (Mu  
512 Biotechnology, Guangzhou). Phosphorylated NtrX levels from *S. meliloti* cells were  
513 separated in Phos-Tag gel. *S. meliloti* 1021 carrying *pntrX* or *pntrX*<sup>D53E</sup> was cultured  
514 in LB/MC broth induced by 1mM IPTG for 1 to 3 hours. ~1  $\mu$ g total protein was input  
515 for each sample. All proteins were transferred onto PVDF, and then detected by anti-  
516 NtrX antibodies from Western blotting assays (13).

### 517 **Western blotting**

518 Western blotting was performed as described by Tang (37). Proteins were detected  
519 using an ECL fluorescence colorimetric kit (Tiangen) and visualized using a Bio-Rad  
520 Gel Doc XR. Anti-NtrX antibodies were prepared in Wenyuange, Shanghai,  
521 China(35); anti-eGFP antibodies were purchased from Thermo. Anti-CtrA and anti-  
522 GcrA antibodies were prepared by Hua'an Biotech, Hangzhou, China.

### 523 **Microscopy**

524 A 5- $\mu$ l aliquot of fresh *S. meliloti* culture (OD<sub>600</sub> = 0.15) was placed on a glass slide  
525 and covered with a cover glass. The slide was slightly baked for a few seconds near  
526 the edge of the flame of an alcohol lamp. Cells expressing the pHc60 plasmid were  
527 observed in GFP mode (38), and images were acquired using a CCD camera Axiocam  
528 506 color (Zeiss). The exposure time was set to 10 ms and 1,000 ms in order to  
529 capture bacterial morphology and motility, respectively. The images were analyzed  
530 with ZEN 2012 software (Zeiss).

531 The scanning electron microscopy, assays of cell motility in LB/MC swarming plates  
532 and succinoglycan production on calcoflour plates were performed as Wang (29).

### 533 **ChIP sequencing and bioinformatic analysis**

534 ChIP-Seq were performed by Bohao Biotech, Shanghai. The original genome data of  
535 *S. meliloti* 1021 were obtained from NCBI. The sequencing data were analyzed by  
536 Bohao Biotech, Shanghai. . IGV software was employed to assess specific enrichment  
537 data based on ChIP-Seq results, and screenshots were generated for peak maps  
538 (39).Genome-wide CAAN<sub>1-6</sub>TTG *cis*-acting elements of bacteria were evaluated  
539 using the genome-scan dna pattern program on the RAST online server

540 (<http://embnet.ccg.unam.mx/rsat>) (40). The BDGP program was applied for promoter  
541 prediction ([http://www.fruitfly.org/seq\\_tools/promoter.html](http://www.fruitfly.org/seq_tools/promoter.html))

### 542 **Protein 3D structure analysis**

543 The NtrX protein 3D structure was reconstructed in Swiss-Model using the template  
544 of 4d6y (the 3D structure of the NtrX receiver domain from *Brucella*) in PDB (41).  
545 The 3D structure of the NtrX receiver domains were analyzed by Pymol (Delano  
546 Scientific).

547

548

549

### 550 **Acknowledgments**

551 This research was supported by the Natural Science Foundation of China (31570241  
552 to L.L.). We thanks to Dr. Urs Jena for providing the strain of *C. crescentus* N1000,  
553 and Dr. Yiwen Wang (Eastern Normal University) for help of SEM.

554

555

556

### 557 **References**

- 558 1. Laub MT, McAdams HH, Feldblyum T, Fraser CM, Shapiro L. 2000. Global analysis of the  
559 genetic network controlling a bacterial cell cycle. *Science* 290:2144-8.
- 560 2. Skerker JM, Laub MT. 2004. Cell-cycle progression and the generation of asymmetry in  
561 *Caulobacter crescentus*. *Nat Rev Microbiol* 2:325-37.
- 562 3. Laub MT, Shapiro L, McAdams HH. 2007. Systems biology of *Caulobacter*. *Annu Rev Genet*  
563 41:429-41.
- 564 4. Panis G, Murray SR, Viollier PH. 2015. Versatility of global transcriptional regulators in  
565 alpha-Proteobacteria: from essential cell cycle control to ancillary functions. *FEMS*  
566 *Microbiol Rev* 39:120-33.
- 567 5. Jacobs C, Ausmees N, Cordwell SJ, Shapiro L, Laub MT. 2003. Functions of the CckA  
568 histidine kinase in *Caulobacter* cell cycle control. *Molecular Microbiology* 47:1279-1290.
- 569 6. Biondi EG, Reisinger SJ, Skerker JM, Arif M, Perchuk BS, Ryan KR, Laub MT. 2006. Regulation  
570 of the bacterial cell cycle by an integrated genetic circuit. *Nature* 444:899-904.
- 571 7. Jones KM, Kobayashi H, Davies BW, Taga ME, Walker GC. 2007. How rhizobial symbionts  
572 invade plants: the *Sinorhizobium-Medicago* model. *Nature Reviews Microbiology*  
573 5:619-633.
- 574 8. Van de Velde W, Zehirov G, Szatmari A, Debreczeny M, Ishihara H, Kevei Z, Farkas A,

- 575 Mikulass K, Nagy A, Tiricz H, Satiat-Jeunemaitre B, Alunni B, Bourge M, Kucho K, Abe M,  
576 Kereszt A, Maroti G, Uchiumi T, Kondorosi E, Mergaert P. 2010. Plant peptides govern  
577 terminal differentiation of bacteria in symbiosis. *Science* 327:1122-6.
- 578 9. Farkas A, Maroti G, Durgo H, Gyorgypal Z, Lima RM, Medzihradzky KF, Kereszt A, Mergaert  
579 P, Kondorosi E. 2014. *Medicago truncatula* symbiotic peptide NCR247 contributes to  
580 bacteroid differentiation through multiple mechanisms. *Proc Natl Acad Sci U S A*  
581 111:5183-8.
- 582 10. Penterman J, Abo RP, De Nisco NJ, Arnold MF, Longhi R, Zanda M, Walker GC. 2014. Host  
583 plant peptides elicit a transcriptional response to control the *Sinorhizobium meliloti* cell  
584 cycle during symbiosis. *Proc Natl Acad Sci U S A* 111:3561-6.
- 585 11. Montiel J, Downie JA, Farkas A, Bihari P, Herczeg R, Balint B, Mergaert P, Kereszt A,  
586 Kondorosi E. 2017. Morphotype of bacteroids in different legumes correlates with the  
587 number and type of symbiotic NCR peptides. *Proc Natl Acad Sci U S A* 114:5041-5046.
- 588 12. Kobayashi H, De Nisco NJ, Chien P, Simmons LA, Walker GC. 2009. *Sinorhizobium meliloti*  
589 CpdR1 is critical for co-ordinating cell cycle progression and the symbiotic chronic  
590 infection. *Molecular Microbiology* 73:586-600.
- 591 13. Pini F, Frage B, Ferri L, De Nisco NJ, Mohapatra SS, Taddei L, Fioravanti A, Dewitte F,  
592 Galardini M, Brilli M, Villeret V, Bazzicalupo M, Mengoni A, Walker GC, Becker A, Biondi  
593 EG. 2013. The DivJ, CbrA and PleC system controls DivK phosphorylation and symbiosis  
594 in *Sinorhizobium meliloti*. *Molecular Microbiology* 90:54-71.
- 595 14. Xue S, Biondi EG. 2018. Coordination of symbiosis and cell cycle functions in *Sinorhizobium*  
596 *meliloti*. *Biochim Biophys Acta* doi:10.1016/j.bbagr.2018.05.003.
- 597 15. Robinson MD, Oshlack A. 2010. A scaling normalization method for differential expression  
598 analysis of RNA-seq data. *Genome Biology* 11.
- 599 16. Schallies KB, Sadowski C, Meng JL, Chien P, Gibson KE. 2015. *Sinorhizobium meliloti* CtrA  
600 Stability Is Regulated in a CbrA-Dependent Manner That Is Influenced by CpdR1. *Journal*  
601 *of Bacteriology* 197:2139-2149.
- 602 17. Pawlowski K, Klosse U, de Bruijn FJ. 1991. Characterization of a novel *Azorhizobium*  
603 *caulinodans* ORS571 two-component regulatory system, NtrY/NtrX, involved in nitrogen  
604 fixation and metabolism. *Mol Gen Genet* 231:124-38.
- 605 18. Nogales J, Campos R, BenAbdelkhalik H, Olivares J, Lluch C, Sanjuan J. 2002. *Rhizobium*  
606 *tropici* genes involved in free-living salt tolerance are required for the establishment of  
607 efficient nitrogen-fixing symbiosis with *Phaseolus vulgaris*. *Mol Plant Microbe Interact*  
608 15:225-32.
- 609 19. Ishida ML, Assumpcao MC, Machado HB, Benelli EM, Souza EM, Pedrosa FO. 2002.  
610 Identification and characterization of the two-component NtrY/NtrX regulatory system  
611 in *Azospirillum brasilense*. *Braz J Med Biol Res* 35:651-61.
- 612 20. Bonato P, Alves LR, Osaki JH, Rigo LU, Pedrosa FO, Souza EM, Zhang N, Schumacher J, Buck  
613 M, Wasseem R, Chubatsu LS. 2016. The NtrY-NtrX two-component system is involved in  
614 controlling nitrate assimilation in *Herbaspirillum seropedicae* strain SmR1. *FEBS J*  
615 283:3919-3930.
- 616 21. Gregor J, Zeller T, Balzer A, Haberzettl K, Klug G. 2007. Bacterial regulatory networks include  
617 direct contact of response regulator proteins: Interaction of RegA and NtrX in  
618 *Rhodobacter capsulatus*. *Journal of Molecular Microbiology and Biotechnology* 13:126-

- 619 139.
- 620 22. Lemmer KC, Alberge F, Myers KS, Dohnalkova AC, Schaub RE, Lenz JD, Imam S, Dillard JP,  
621 Noguera DR, Donohue TJ. 2020. The NtrYX Two-Component System Regulates the  
622 Bacterial Cell Envelope. *mBio* 11.
- 623 23. Carrica MD, Fernandez I, Marti MA, Paris G, Goldbaum FA. 2012. The NtrY/X two-  
624 component system of *Brucella* spp. acts as a redox sensor and regulates the expression  
625 of nitrogen respiration enzymes. *Molecular Microbiology* 85:39-50.
- 626 24. Atack JM, Srikhanta YN, Djoko KY, Welch JP, Hasri NHM, Steichen CT, Hoven RNV,  
627 Grimmond SM, Othman DSMP, Kappler U, Apicella MA, Jennings MP, Edwards JL,  
628 McEwan AG. 2013. Characterization of an ntrX Mutant of *Neisseria gonorrhoeae* Reveals  
629 a Response Regulator That Controls Expression of Respiratory Enzymes in Oxidase -  
630 Positive Proteobacteria. *Journal of Bacteriology* 195:2632-2641.
- 631 25. Cheng Z, Lin M, Rikihisa Y. 2014. *Ehrlichia chaffeensis* proliferation begins with NtrY/NtrX  
632 and PutA/GlnA upregulation and CtrA degradation induced by proline and glutamine  
633 uptake. *MBio* 5:e02141.
- 634 26. Fernandez I, Sycz G, Goldbaum FA, Carrica MD. 2018. Acidic pH triggers the  
635 phosphorylation of the response regulator NtrX in alphaproteobacteria. *Plos One* 13.
- 636 27. Fernandez I, Otero LH, Klinke S, Carrica MD, Goldbaum FA. 2015. Snapshots of  
637 Conformational Changes Shed Light into the NtrX Receiver Domain Signal Transduction  
638 Mechanism. *Journal of Molecular Biology* 427:3258-3272.
- 639 28. Fernandez I, Cornaciu I, Carrica MD, Uchikawa E, Hoffmann G, Sieira R, Marquez JA,  
640 Goldbaum FA. 2017. Three-Dimensional Structure of Full-Length NtrX, an Unusual  
641 Member of the NtrC Family of Response Regulators. *Journal of Molecular Biology*  
642 429:1192-1212.
- 643 29. Wang D, Xue H, Wang Y, Yin R, Xie F, Luo L. 2013. The *Sinorhizobium meliloti* ntrX gene is  
644 involved in succinoglycan production, motility, and symbiotic nodulation on alfalfa. *Appl*  
645 *Environ Microbiol* 79:7150-9.
- 646 30. Calatrava-Morales N, Nogales J, Amezttoy K, van Steenberg B, Soto MJ. 2017. The  
647 NtrY/NtrX System of *Sinorhizobium meliloti* GR4 Regulates Motility, EPS I Production,  
648 and Nitrogen Metabolism but Is Dispensable for Symbiotic Nitrogen Fixation. *Mol Plant*  
649 *Microbe Interact* 30:566-577.
- 650 31. Khan SR, Gaines J, Roop RM, 2nd, Farrand SK. 2008. Broad-host-range expression vectors  
651 with tightly regulated promoters and their use to examine the influence of TraR and  
652 TraM expression on Ti plasmid quorum sensing. *Appl Environ Microbiol* 74:5053-62.
- 653 32. Pini F, De Nisco NJ, Ferri L, Penterman J, Fioravanti A, Brillì M, Mengoni A, Bazzicalupo M,  
654 Viollier PH, Walker GC, Biondi EG. 2015. Cell Cycle Control by the Master Regulator CtrA  
655 in *Sinorhizobium meliloti*. *Plos Genetics* 11.
- 656 33. Langmead B, Trapnell C, Pop M, Salzberg SL. 2009. Ultrafast and memory-efficient  
657 alignment of short DNA sequences to the human genome. *Genome Biol* 10:R25.
- 658 34. De Nisco NJ, Abo RP, Wu CM, Penterman J, Walker GC. 2014. Global analysis of cell cycle  
659 gene expression of the legume symbiont *Sinorhizobium meliloti*. *Proc Natl Acad Sci U S*  
660 *A* 111:3217-24.
- 661 35. Zeng S, Xing S, An F, Yang X, Yan J, Yu L, Luo L. 2020. *Sinorhizobium meliloti* NtrX interacts  
662 with different regions of the *visN* promoter. *Acta Biochim Biophys Sin (Shanghai)*

- 663 52:910-913.
- 664 36. Tang G, Wang Y, Luo L. 2014. Transcriptional regulator LsrB of *Sinorhizobium meliloti*  
665 positively regulates the expression of genes involved in lipopolysaccharide biosynthesis.  
666 *Appl Environ Microbiol* 80:5265-73.
- 667 37. Tang G, Xing S, Wang S, Yu L, Li X, Staehelin C, Yang M, Luo L. 2017. Regulation of cysteine  
668 residues in LsrB proteins from *Sinorhizobium meliloti* under free-living and symbiotic  
669 oxidative stress. *Environ Microbiol* 19:5130-5145.
- 670 38. Cheng HP, Walker GC. 1998. Succinoglycan is required for initiation and elongation of  
671 infection threads during nodulation of alfalfa by *Rhizobium meliloti*. *Journal of*  
672 *Bacteriology* 180:5183-5191.
- 673 39. Thorvaldsdottir H, Robinson JT, Mesirov JP. 2013. Integrative Genomics Viewer (IGV): high-  
674 performance genomics data visualization and exploration. *Briefings in Bioinformatics*  
675 14:178-192.
- 676 40. van Helden J. 2003. Regulatory sequence analysis tools. *Nucleic Acids Res* 31:3593-6.
- 677 41. Arnold K, Bordoli L, Kopp J, Schwede T. 2006. The SWISS-MODEL workspace: a web-based  
678 environment for protein structure homology modelling. *Bioinformatics* 22:195-201.
- 679
- 680
- 681

## 682 **Legends**

### 683 **Fig. 1. Cell division defects of the *S. meliloti ntrX* mutants in LB/MC medium.**

684 (A, E) Cell shapes of the *ntrX* mutants under a light microscope or (B) a scanning  
685 electron microscope. Red arrows, abnormal cells; bars, 2 $\mu$ m. (C, F) Genomic DNA  
686 content of the *ntrX* mutants determined by flow cytometry. (D) Growth curve of the  
687 *ntrX* depletion strain in presence of 1 mM IPTG (the blue curve) and in absence of  
688 IPTG (the red curve). *ntrX18*, SmLL1(29), *ntrX::pK18mobsacB*; the *ntrX* depletion  
689 strain was used in D and F.

690

### 691 **Fig. 2. Differential expression of the CtrA system genes in the *ntrX* mutants.**

692 (A-B) Transcript levels of the CtrA system genes in the *ntrX* mutants evaluated by  
693 qRT-PCR. Error bars,  $\pm$ SD. Student's t-test was used for significance evaluation. \*,  
694  $P < 0.05$ . \*\*,  $P < 0.001$ . (C-D) Protein levels of NtrX, CtrA and GcrA in the *ntrX* mutant  
695 evaluated by Western blotting. The *ntrX* depletion strain was used in the experiment  
696 of B and D. All experiments were repeated twice.

697

698 **Fig. 3. *S. meliloti* NtrX heterogeneously regulates expression of the CtrA system**  
699 **genes in *E. coli*.**

700 (A) GUS staining results of *E. coli* DH5a colonies containing the promoter-*uidA*  
701 fusion on LB plates. (B) GUS activity level of *E. coli* DH5a cells containing the  
702 promoter-*uidA* fusion in LB broth. Error bars,  $\pm$ SD. Student's t-test was used for  
703 significance evaluation. \*,  $P < 0.05$ . All experiments were repeated twice.

704

705 **Fig. 4. Cell division defects of *S. meliloti* 1021 expressing NtrX<sup>D53E</sup>.**

706 (A) Growth curve of *S. meliloti* 1021 expressing NtrX<sup>D53E</sup>. Error bars,  $\pm$ SD. (B)  
707 Motility and succinoglycan production of *S. meliloti* 1021 expressing NtrX<sup>D53E</sup>. (C)  
708 Cell shapes of *S. meliloti*1021 expressing NtrX<sup>D53E</sup> under a fluorescence microscope.  
709 Bars, 100  $\mu$ m. (D) Fluorescence intensity of *S. meliloti* 1021 expressing NtrX or  
710 NtrX<sup>D53E</sup> determined by flow cytometry. Each strain carried the plasmid pHC60 for  
711 constitutive expression of GFP(38). All experiments were repeated twice.

712

713 **Fig. 5. Differential expression of the CtrA system genes in *S. meliloti* 1021/  
714 *pntrX*<sup>D53E</sup>.**

715 (A) Transcript levels of the CtrA system genes in *S. meliloti*1021/ *pntrX*<sup>D53E</sup> evaluated  
716 by qRT-PCR. Error bars,  $\pm$ SD. Student's t-test was used for significance evaluation. \*,  
717  $P < 0.05$ . (B) Protein levels of NtrX, CtrA and GcrA in *S. meliloti* cells evaluated by  
718 Western blotting. -, without IPTG induction; +, treatment of 1 mM IPTG for 1, 2 and  
719 3 hours. All experiments were repeated twice.

720

721 **Fig. 6. Function of the 53<sup>rd</sup> aspartate residue in the NtrX receiver domain.**

722 (A) Alignment of f NtrX receiver domain from four bacterial species. The amino acid  
723 sequence of each protein was obtained from NCBI. The secondary structures of the  
724 receiver domain were shown as green lines (loops), yellow arrows ( $\beta$ - sheets) and red  
725 bars ( $\alpha$ -helixes). Ba2308, *Brucella abortus* biovar 1 str. 2308; Sm1021, *Sinorhizobium*  
726 *meliloti* 1021; AtC58, *Agrobacterium tumefaciens* C58; CcN1000, *Caulobacter*

727 *crenscentus* N1000. (B) 3D structures of NtrX receiver domain from three bacterial  
728 species were reconstructed using *B. abortus* homolog protein (PDB:4d6y) as a  
729 template in Swiss-Model. Electrostatic interactions of the carboxyl group from the  
730 conserved 53<sup>rd</sup> aspartate residues were shown as Arabic number by Pymol. (C) NtrX  
731 phosphorylation catalyzed by the NtrY kinase domain *in vitro*. NtrY-Kr, His-NtrY  
732 kinase domain fusion protein ; NtrXr-P, phosphorylated NtrXr; Ac-Pi, acetyl  
733 phosphate. (D) Phosphorylated NtrX proteins from *S. meliloti* 1021 detected in Phos-  
734 Tag gel and by Western blotting. *S. meliloti* 1021 carrying *pntrX* or *pntrX*<sup>D53E</sup> was  
735 cultured in LB/MC broth induced by 1mM IPTG for 1 to 3 hours. ~ 1 µg total protein  
736 was input for each sample. (E) Colonies of *S. meliloti* 1021 expressing the NtrX  
737 substitution of D53 on LB/MC plates. (F) Colonies of *A. tumefaciens* C58 expressing  
738 the NtrX substitution of D53 on LB plates.

739

740 **Figure 7. NtrX directly interacts with the promoters of the cell cycle regulatory**  
741 **genes *in vivo*.**

742 (A) Genome-wide distribution of DNA fragments specifically precipitated by anti-  
743 NtrX antibodies via ChIP-Seq. The cutoff value is 1600 reads. (B) Peak maps of the  
744 promoter regions for a few cell cycle regulatory genes from the DNA fragments  
745 specifically precipitated by anti-NtrX antibodies. Red bars indicate the putative  
746 recognition sites (CAAN<sub>x</sub>TTG) of NtrX. (C) Abundance of DNA fragments  
747 specifically precipitated by anti-NtrX antibodies, as determined by qPCR. Error bars,  
748 ±SD. Student's t-test was used for significance evaluation. \*, P<0.05. The experiment  
749 was repeated twice.

750

751 **Fig. 8. NtrX interacts with the promoters of the cell cycle regulatory genes by**  
752 **recognizing a conserved *cis*-element.**

753 (A) Statistics of NtrX recognition motifs (CAAN<sub>x</sub>TTG) by scanning the genome of *S.*  
754 *meliloti*1021 in Regulatory Sequence Analysis Tool (RSAT). (B) The conserved motif  
755 CAAN<sub>(1-6)</sub>TTG in the promoters of cell cycle regulatory genes. \*, the predicted



756 translation start is indicated by +1. (C-F) The promoter regions of *ntrY* (C), *ctrA* (D),  
757 *dnaA* (E), *gcrA* (F) containing at least one CAAN<sub>(1-6)</sub>TTG motif were directly bound  
758 by the phosphorylated NtrX protein *in vitro*, as based on EMSA. His-NtrX<sup>D53E</sup>, the  
759 His-NtrX fusion protein containing a substitution of D53 (phosphorylation site) to E  
760 in (C). Probe *PdnaAs* is the DNA probe *PdnaA* with CAAAACCCTTG replaced by  
761 CGGAACCCCG in (E). D/P complex, DNA-protein complex; competitor, probe  
762 DNA without biotin labeling. The amounts of His-NtrX proteins were 3, 6 and 15 ng  
763 for each probe (2 nM). P, the putative transcriptional start site was predicted by the  
764 BDGP program. Blue bars, probes for EMSA; red bars, putative binding sites. All  
765 experiments were repeated twice.

766

767 **Fig. 9. A NtrX-mediated transcriptional control system of *S. meliloti* cell cycle**  
768 **progression**

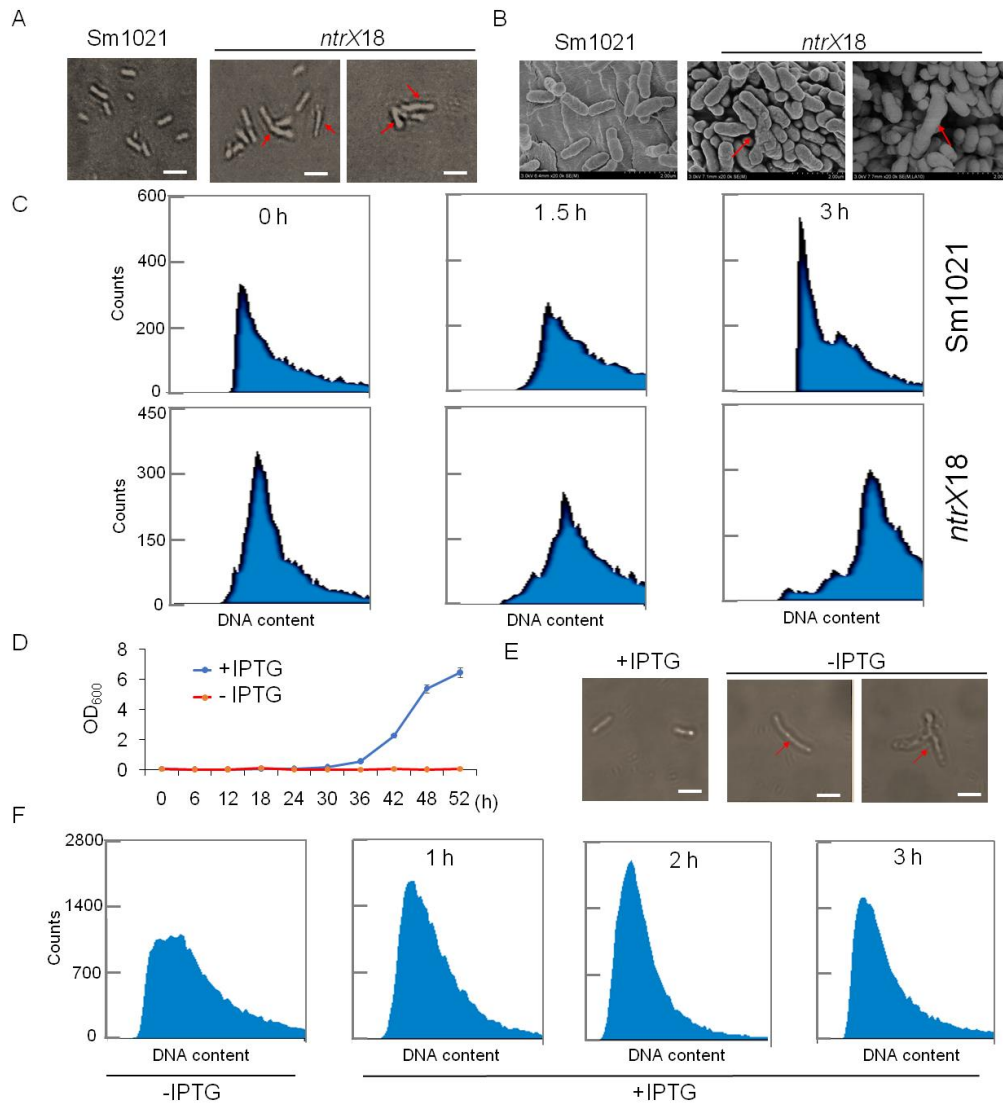

**Fig.1**

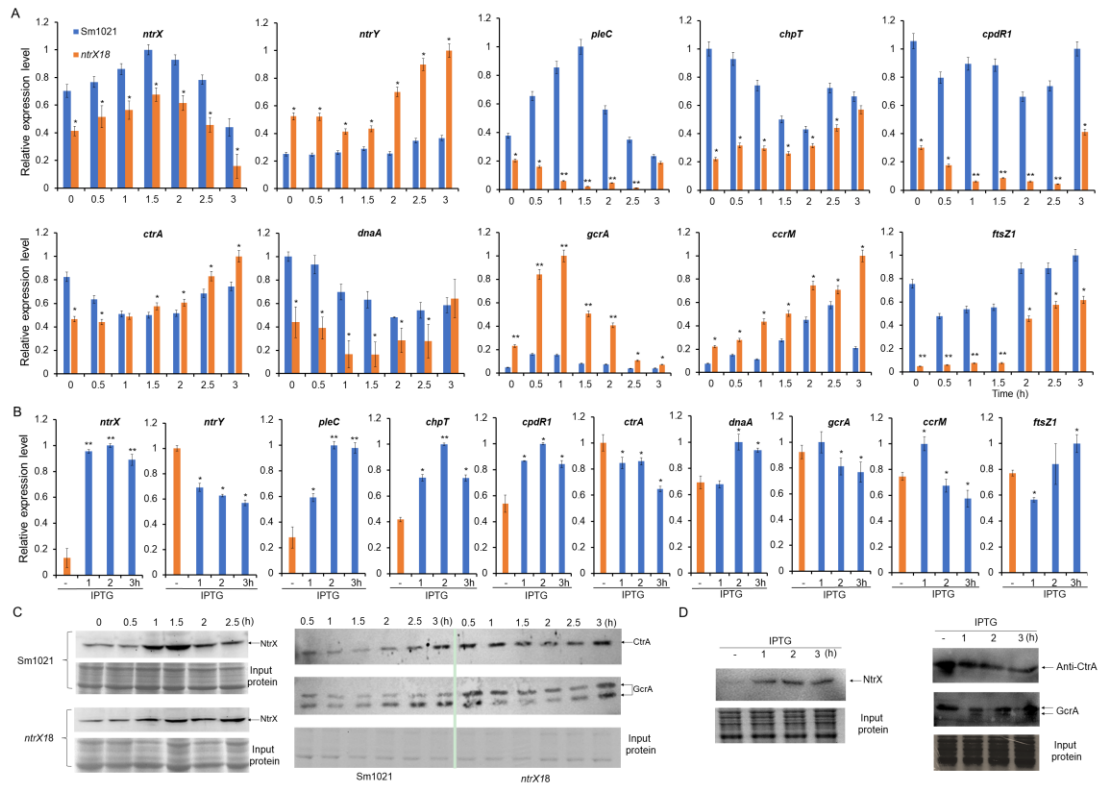

**Fig.2**

786  
787  
788  
789  
790  
791  
792  
793  
794  
795  
796  
797  
798  
799  
800  
801  
802  
803  
804  
805  
806  
807  
808  
809

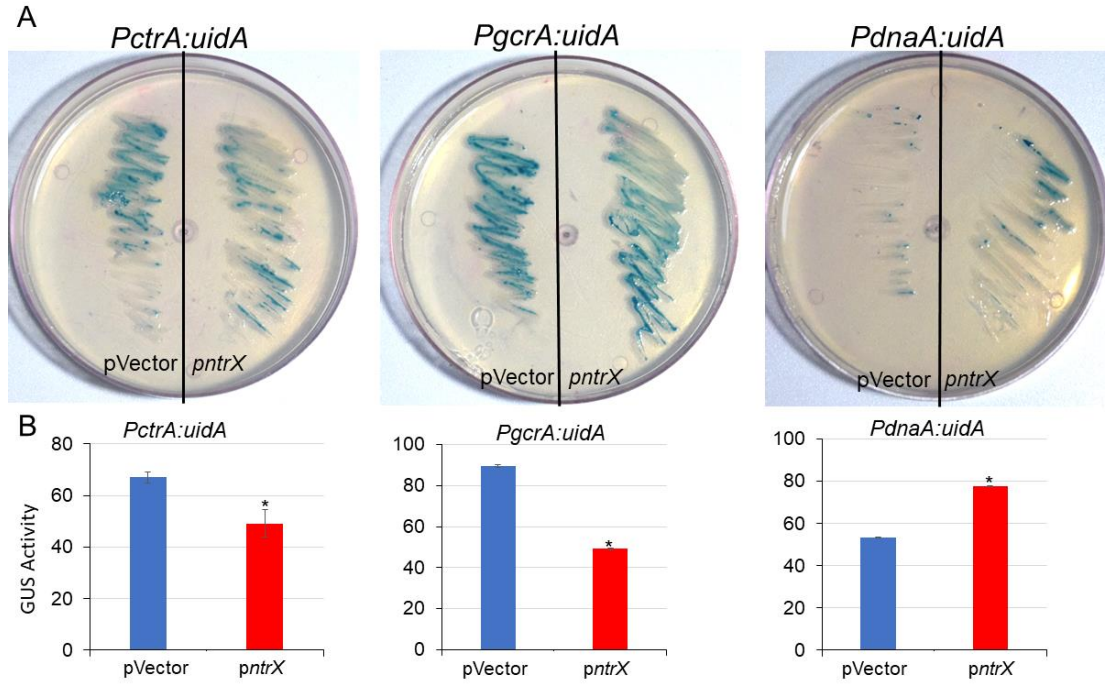

810

811

812

813

814

815

816

817

818

819

820

821

822

823

824

825

826

827

828

829

830

831

832

833

834

835

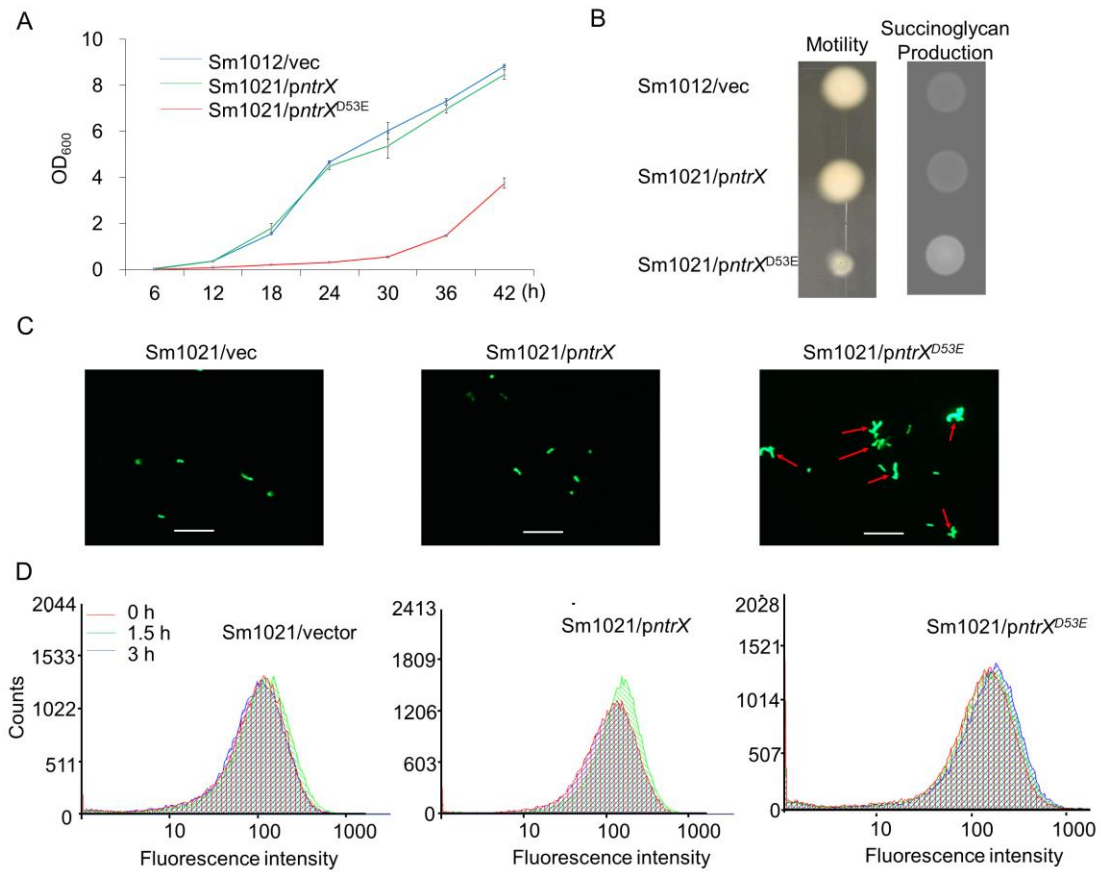

**Fig. 4**

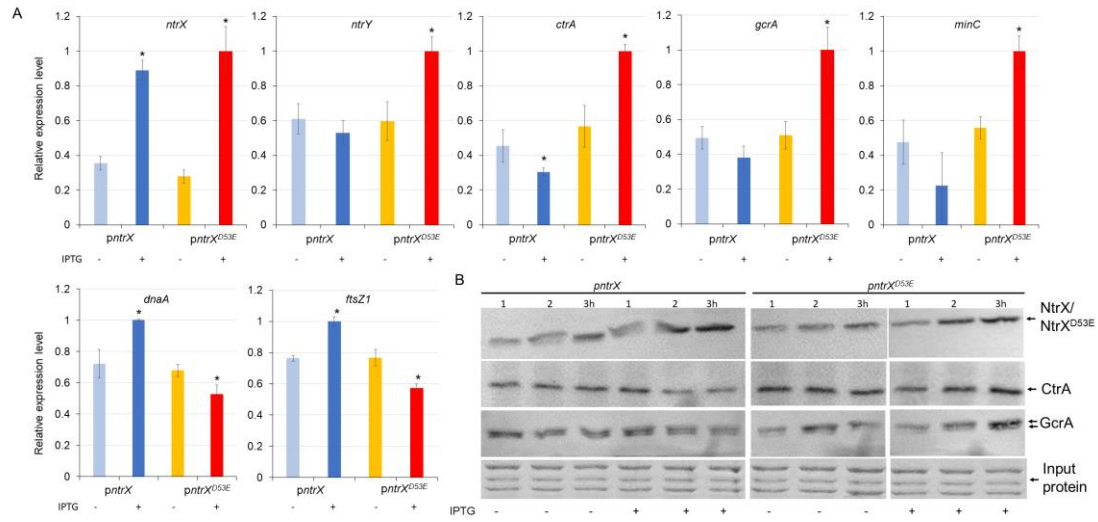

**Fig. 5**

857  
858  
859  
860  
861  
862  
863  
864  
865  
866  
867  
868  
869  
870  
871  
872  
873  
874  
875  
876  
877  
878  
879  
880  
881  
882  
883  
884  
885  
886

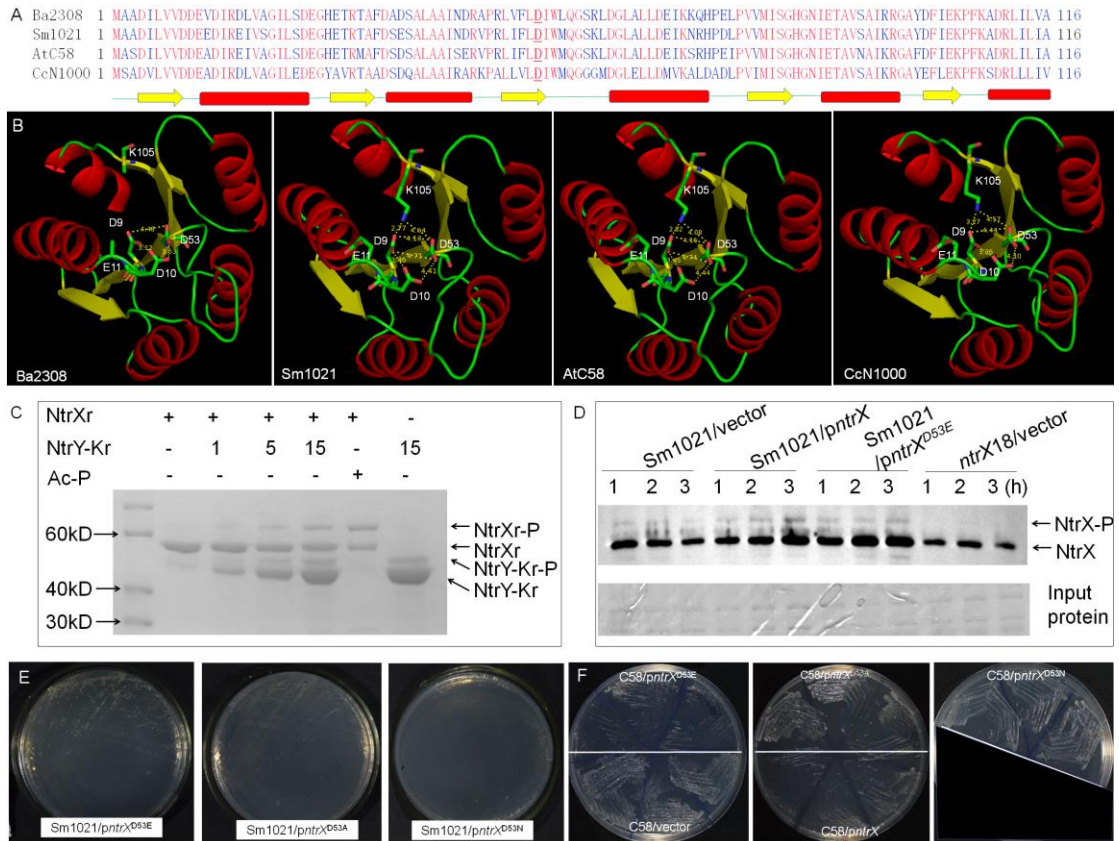

**Fig. 6**

887

888

889

890

891

892

893

894

895

896

897

898

899

900

901

902

903

904

905

906

907

908

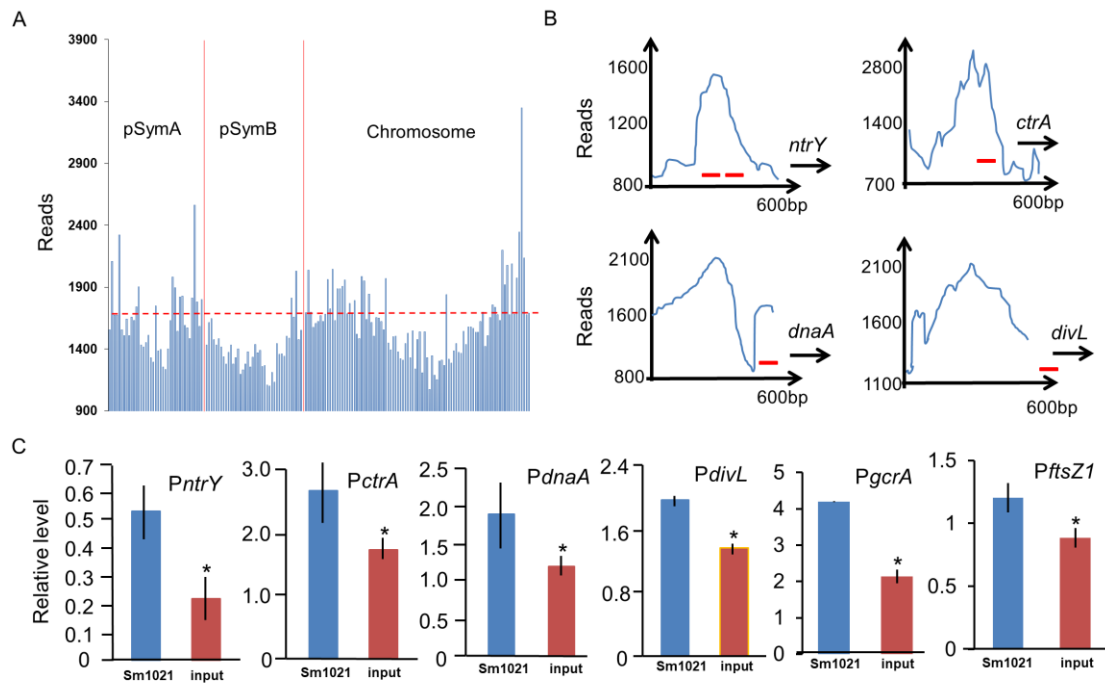

**Fig. 7**

909

910

911

912

913

914

915

916

917

918

919

920

921

922

923

924

925

926

927

928

929

930

931

932

933

934



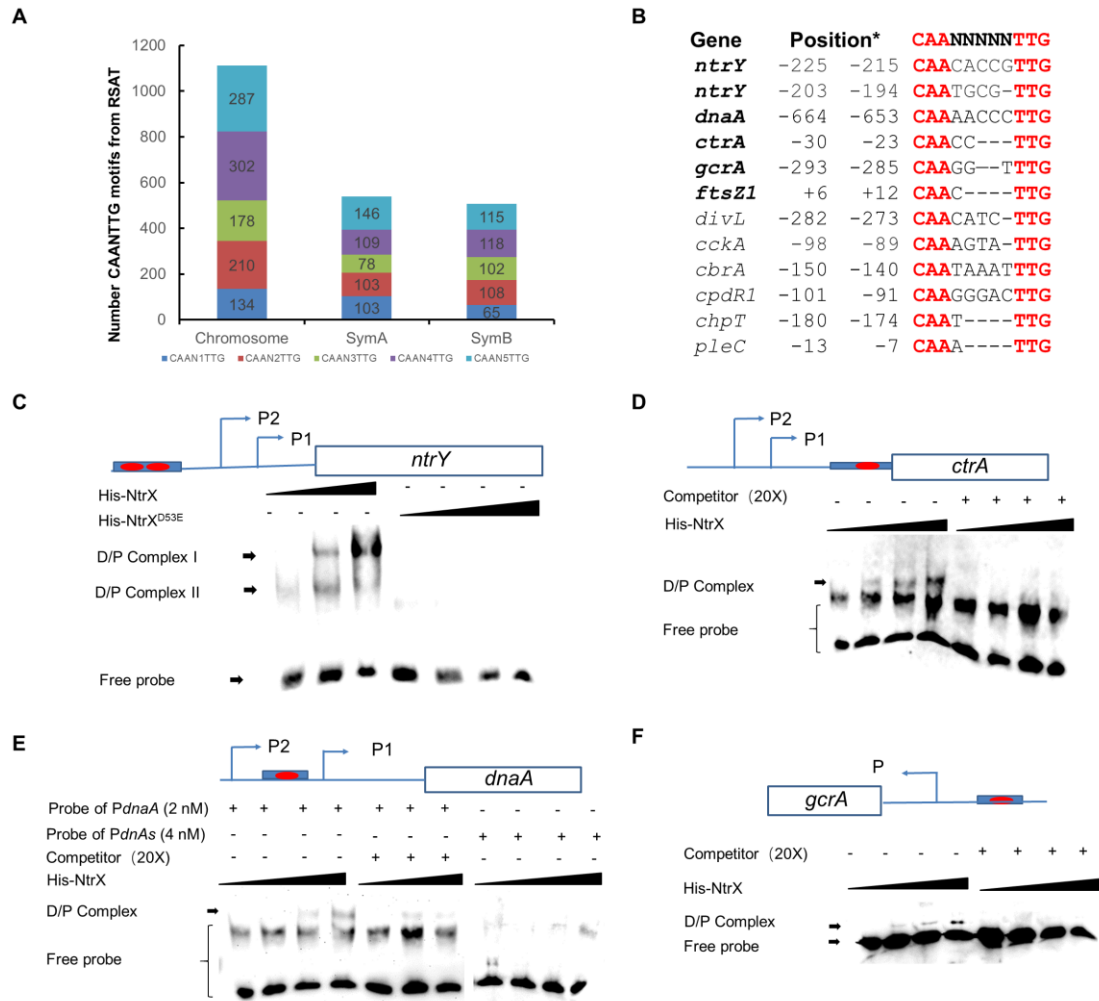

Fig. 8

935  
936  
937  
938  
939  
940  
941  
942  
943  
944  
945  
946  
947  
948  
949  
950  
951  
952  
953

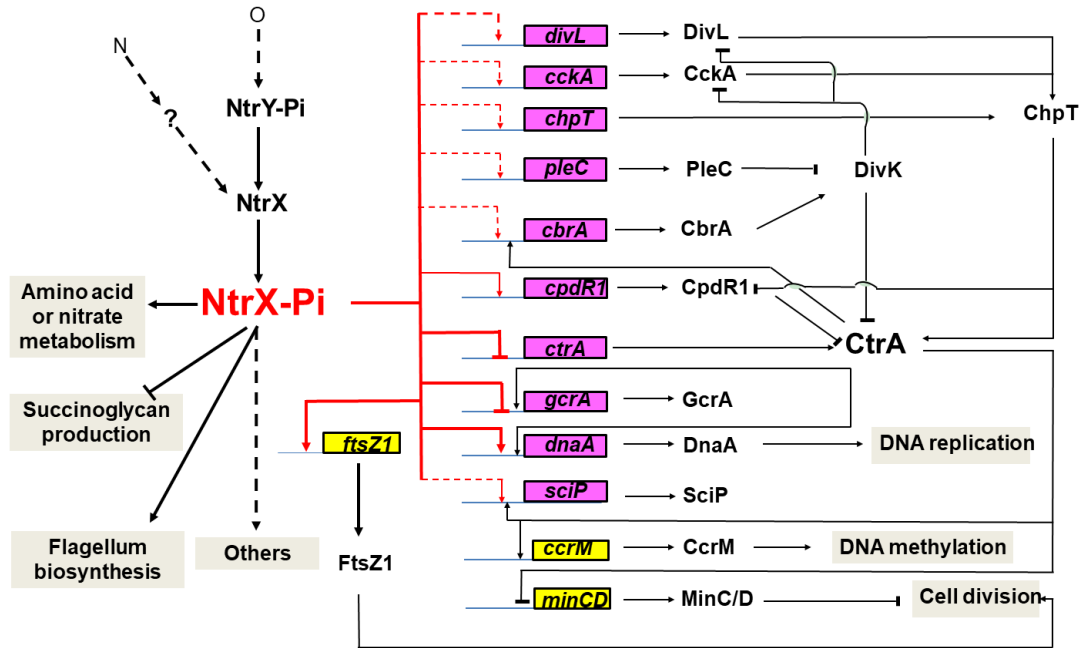

954

955

Fig. 9
